# Supplementary material
Source: PubMed Central journal article supplement (PMC8163750)
Supplement: 41396_2020_891_MOESM1_ESM.pdf [file 41396_2020_891_MOESM1_ESM.pdf]

## **Supplementary Information**

**Light stimulates anoxic and oligotrophic growth of glacial *Flavobacterium* strains that produce zeaxanthin**

This file contains Supplementary Figures (page 2) and Tables (page 9), which has provided additional information in the zeaxanthin-associated light stimulation of the glacial *Flavobacterium* strains in lower oxygen availability or poor nutrients.

**Supplementary figure titles and legends:**

**Supplementary Figure 1.** Assay of flexirubin produced by some *Flavobacterium* strains using 20% KOH described in Methods. Beneath are the glacial strain names, and Hh15T is a strain of *Cryobacterium luteum* isolated from the same glacier.

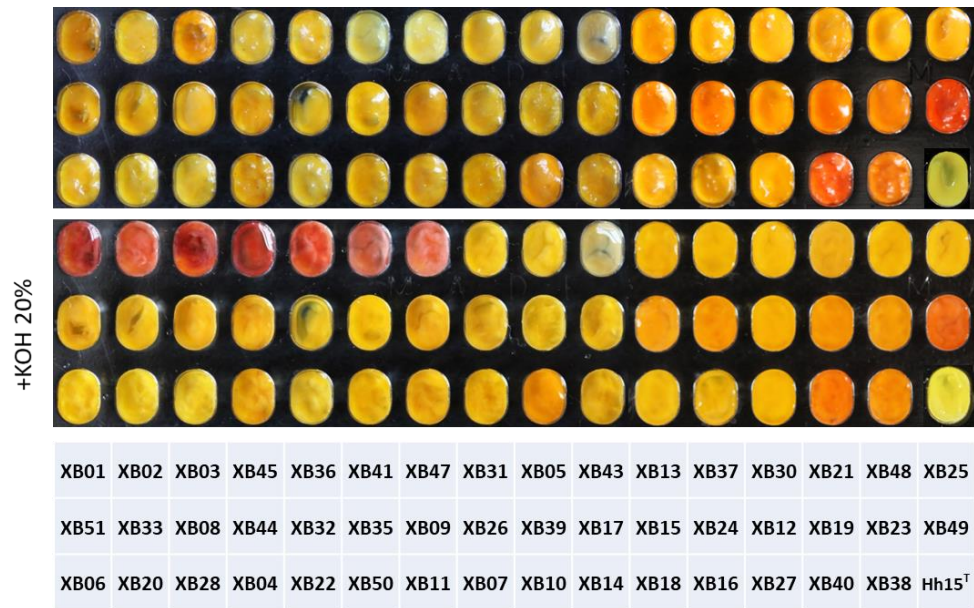

**Supplementary Figure 2. The spectra of carotenoids extracted from the glacial *Cryobacterium luteum* Hh15<sup>T</sup> and *Flavobacterium* XB07 and XB49.**

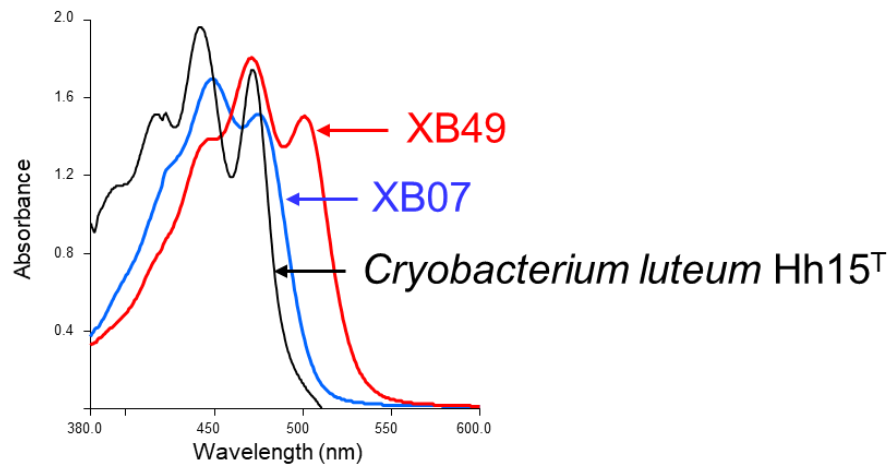

**Supplementary Figure 3. Light induced zeaxanthin production of the glacial *Flavobacterium* strains.** HPLC determined the carotenoid yields in the cultures of light exposure (red) and in dark (blue) from each four strains that carry the proteorhodopsin gene (lower) or not (upper). The same assay procedure was used as that in Figure 4c. Extraction of zeaxanthin was described in the methods section. Rt: retention time.

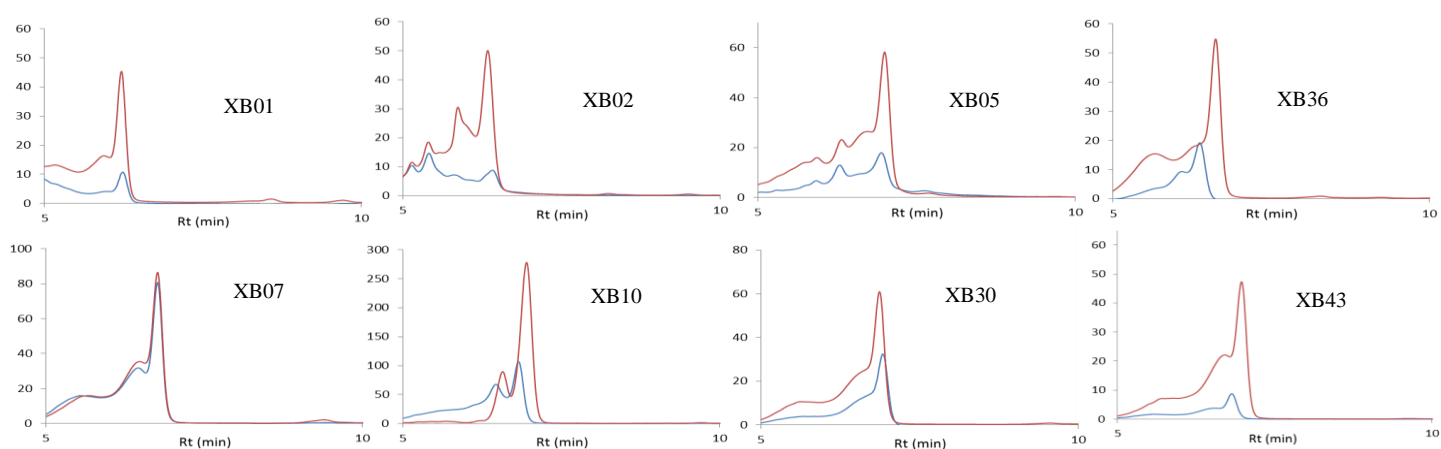

**Supplementary Figure 4. A Bayesian phylogenetic tree of the rhodopsin proteins from 37 glacial *Flavobacterium* strains and other types of rhodopsin proteins.**

Strain numbers in blue and orange indicate those isolated from northern and southern glaciers, respectively. PR, proteorhodopsin; XR, xanthorhodopsin; HR, halorhodopsin. Bar, 0.2 amino acid substitution/site.

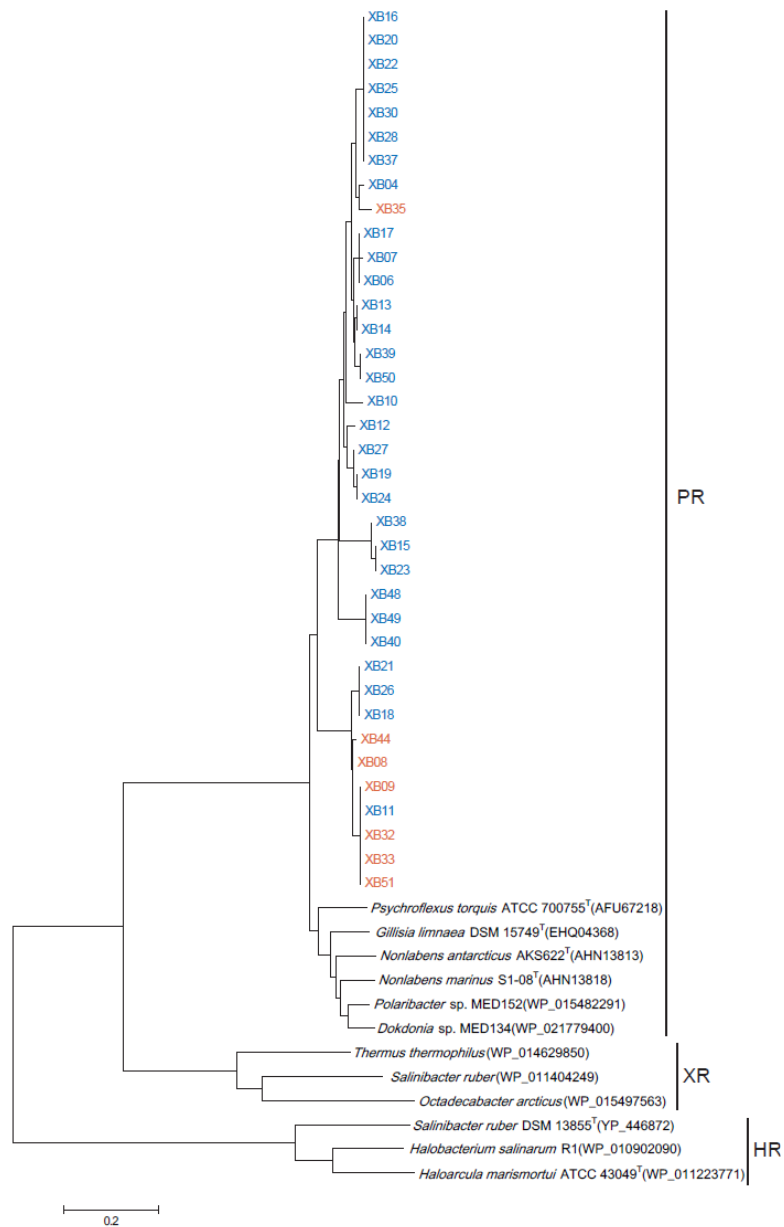

**Supplementary Figure 5. PCR verification of the absence of the not sequenced *prd* gene in some glacial *Flavobacterium* genomes.** A pair of primers listed in Supplementary Table S2 that specifically hybrid to the PR gene was used. Strains that have the *prd* gene sequenced were included as the references. M, DNA ladder.

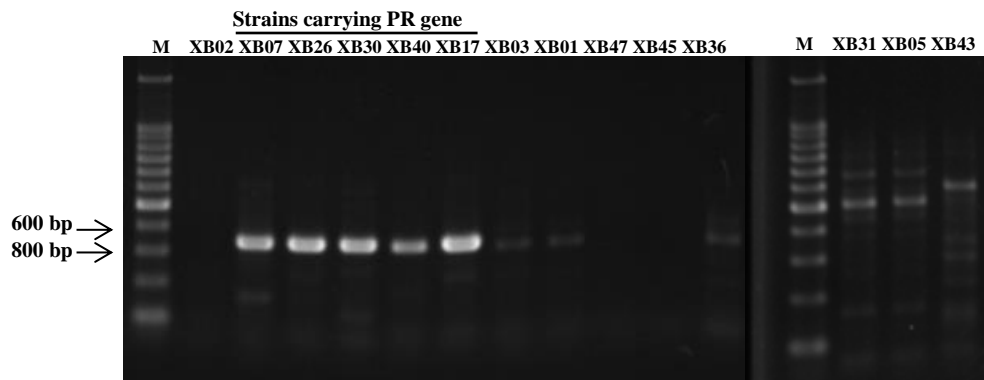

**Supplementary Figure 6. Verification of the *prd* gene deletion in strain XB07 via DNA sequencing.** The genomic DNAs of strain XB07 wild type and the *prd* gene deletion mutant were sanger sequenced using primer PR\_delR (Supplementary Table 2) on ABI 3730. A sequencing chart presents an insertion of cleavage motif of the restriction DNase SalF replaced the *prd* encoding region comparing with that of the wild type.

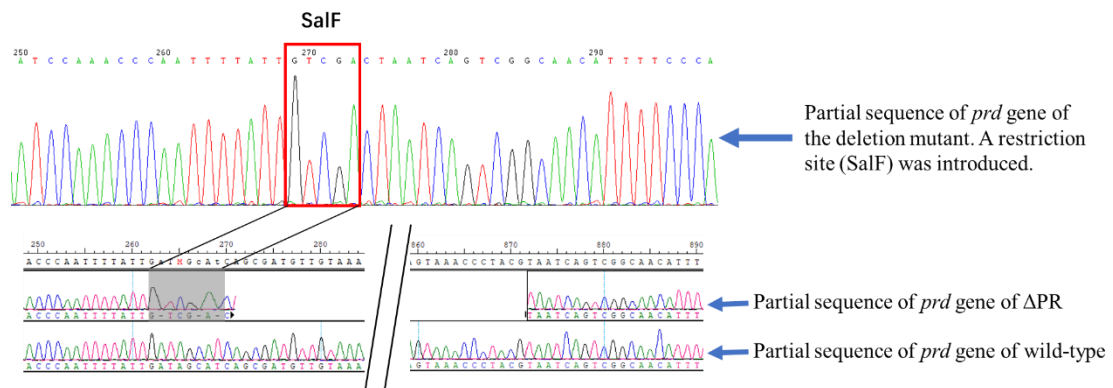

**Supplementary Figure 7. Assay of light-driven proton pump activity (a) and enhanced glucose consumption (b) in the glacial *Flavobacterium* XB07.** **a.** Using the protocol of Feng et al. (2013), light-driven proton pump activity was determined via measuring the pH changes in the cell suspension (initial pH 7.0) at 14°C under photo flux of 50 photon m<sup>-2</sup>·s<sup>-1</sup>. Shaded areas represent dark conditions. **b.** The stationary spent PGY cultures that were grown in light and dark, and at 7 °C and 14 °C were assayed for the residual glucose contents using 3,5-dinitrosalicylic acid (DNS) reagent [Miller, 1959]. Triplicated cultures were assayed, and the averages and standard derivations are shown.

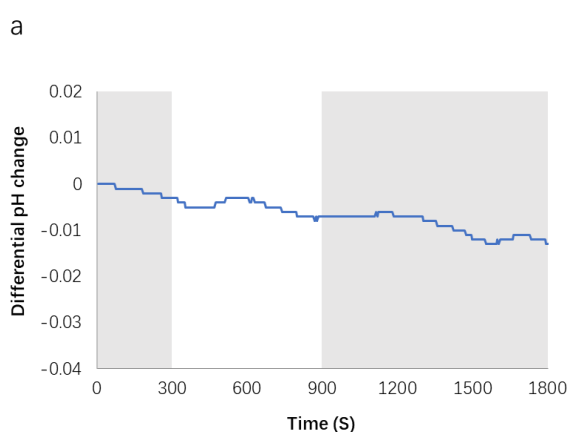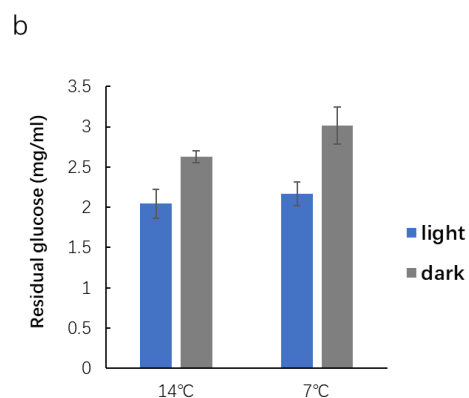



## Supplementary tables

Supplementary Table 1. Strains used in this study\*

| Isolates | Strain No.<br>in<br>CGMCC | 16S rRNA<br>gene Acc. # | Most related species<br>(16S rRNA similarity %)         | Isolation location    | Opt. T (°C) | Genome acc<br>No of NCBI |
|----------|---------------------------|-------------------------|---------------------------------------------------------|-----------------------|-------------|--------------------------|
| XB01     | 1.10046                   | JX290502                | <i>F. frigidimaris</i> KUC-1 (98.90)                    | Hailuogou glacier     | 14          | SRR5506633               |
| XB02     | 1.9982                    | JX290495                | <i>F. hibernum</i> ATCC 51468 (99.03)                   | Hailuogou glacier     | 14          | SRR5506632               |
| XB03     | 1.10006                   | JX290498                | <i>F. frigidimaris</i> KUC-1 (98.89)                    | Hailuogou glacier     | 14          | SRR5506631               |
| XB04     | 1.9356                    | JX290459                | <i>F. limicola</i> ST-82 (98.34)                        | Toumingmengke glacier | 14          | SRR5506630               |
| XB05     | 1.9759                    | JX290489                | <i>F. sinopsychrotolerans</i> 0533 (98.91)              | Midui glacier         | 14          | SRR5506629               |
| XB06     | 1.9686                    | JX290486                | <i>F. sinopsychrotolerans</i> 0533 (99.85)              | Toumingmengke glacier | 14          | SRR5506628               |
| XB07     | 1.9225                    | JX949246                | <i>F. psychrolimnae</i> LMG 22018 (99.35)               | Xinjiang No.1 glacier | 14          | SRR5506627               |
| XB08     | 1.10002                   | JX290496                | <i>F. xinjiangense</i> JCM 11314 (99.78)                | Hailuogou glacier     | 14          | SRR5506626               |
| XB09     | 1.9905                    | JX290493                | <i>F. xinjiangense</i> JCM 11314 (99.71)                | Midui glacier         | 14          | SRR5506625               |
| XB10     | <b>1.2747<sup>T</sup></b> | AF433174                | <b><i>F. omnivorum</i> JCM 11313<sup>T,1</sup></b>      | Xinjiang No.1 glacier | <20         | SRR5506624               |
| XB11     | <b>1.2749<sup>T</sup></b> | AF433173                | <b><i>F. xinjiangense</i> JCM 11314<sup>T,1</sup></b>   | Xinjiang No.1 glacier | <20         | SRR5506623               |
| XB12     | <b>1.6847<sup>T</sup></b> | EU036219                | <b><i>F. tiangeerense</i> 0563<sup>T,2</sup></b>        | Xinjiang No.1 glacier | 26          | SRR5506622               |
| XB13     | 1.6461                    | JX290448                | <i>F. sinopsychrotolerans</i> 0533 (99.93)              | Xinjiang No.1 glacier | 14          | SRR5506621               |
| XB14     | <b>1.8704<sup>T</sup></b> | FJ654474                | <b><i>F. sinopsychrotolerans</i> 0533<sup>T,3</sup></b> | Xinjiang No.1 glacier | 25          | SRR5506620               |
| XB15     | 1.9255                    | JX290454                | <i>F. sinopsychrotolerans</i> 0533 (98.11)              | Xinjiang No.1 glacier | 14          | SRR5506619               |
| XB16     | 1.9360                    | JX290460                | <i>F. tiangeerense</i> 563 (98.70)                      | Toumingmengke glacier | 14          | SRR5506618               |
| XB17     | 1.9455                    | JX290469                | <i>F. sinopsychrotolerans</i> 0533 (99.85)              | Toumingmengke glacier | 14          | SRR5506617               |
| XB18     | 1.6442                    | JX290447                | <i>F. urumqiense</i> Sr25 (99.93)                       | Xinjiang No.1 glacier | 14          | SRR5506616               |
| XB19     | 1.9224                    | JX290451                | <i>F. granuli</i> Kw05 (98.48)                          | Xinjiang No.1 glacier | 14          | SRR5506615               |
| XB20     | 1.9381                    | JX290467                | <i>F. psychrolimnae</i> LMG 22018 (98.69)               | Toumingmengke glacier | 14          | SRR5506614               |
| XB21     | 1.6440                    | JX290446                | <i>F. urumqiense</i> Sr25 (99.92)                       | Xinjiang No.1 glacier | 14          | SRR5506613               |
| XB22     | 1.9365                    | JX290463                | <i>F. xueshanense</i> Sr22 (99.78)                      | Toumingmengke glacier | 14          | SRR5506612               |
| XB23     | 1.9215                    | JX290450                | <i>F. sinopsychrotolerans</i> 0533 (98.18)              | Xinjiang No.1 glacier | 14          | SRR5506611               |
| XB24     | 1.9246                    | JX290452                | <i>F. granuli</i> Kw05 (98.47)                          | Xinjiang No.1 glacier | 14          | SRR5506610               |
| XB25     | 1.9361                    | JX290461                | <i>F. xueshanense</i> Sr22 (100)                        | Toumingmengke glacier | 14          | SRR5506609               |
| XB26     | 1.9340                    | JX290457                | <i>F. urumqiense</i> Sr25 (99.20)                       | Toumingmengke glacier | 14          | SRR5506608               |
| XB27     | 1.9175                    | JX290449                | <i>F. pectinovorum</i> DSM 6368 (98.07)                 | Xinjiang No.1 glacier | 14          | SRR5506607               |
| XB28     | 1.9376                    | JX290465                | <i>F. psychrolimnae</i> LMG 22018 (98.63)               | Toumingmengke glacier | 14          | SRR5506606               |
| XB30     | 1.9364                    | JX290462                | <i>F. psychrolimnae</i> LMG 22018 (98.47)               | Toumingmengke glacier | 14          | SRR5506605               |
| XB31     | 1.11100                   | JX290506                | <i>F. sinopsychrotolerans</i> 0533 (98.90)              | Midui glacier         | 14          | SRR5506604               |
| XB32     | 1.11107                   | JX290507                | <i>F. xinjiangense</i> JCM 11314 (99.71)                | Midui glacier         | 14          | SRR5506603               |
| XB33     | 1.10050                   | JX290503                | <i>F. xinjiangense</i> JCM 11314 (100)                  | Hailuogou glacier     | 14          | SRR5506602               |
| XB35     | 1.11109                   | JX290508                | <i>F. glaciei</i> 0499(98.41)                           | Midui glacier         | 14          | SRR5506601               |
| XB36     | 1.9830                    | JX290491                | <i>F. xinjiangense</i> JCM 11314 (99.26)                | Midui glacier         | 14          | SRR5506600               |
| XB37     | <b>1.9227<sup>T</sup></b> | HQ436466                | <b><i>F. xueshanense</i> Sr22<sup>T,4</sup></b>         | Xinjiang No.1 glacier | 18          | SRR5506599               |
| XB38     | 1.9621                    | JX290480                | <i>F. sinopsychrotolerans</i> 0533 (98.47)              | Toumingmengke glacier | 14          | SRR5506598               |
| XB39     | 1.9469                    | JX290470                | <i>F. sinopsychrotolerans</i> 0533 (98.98)              | Toumingmengke glacier | 14          | SRR5506597               |
| XB40     | 1.9333                    | JX290456                | <i>F. tiangeerense</i> 563 (97.93)                      | Xinjiang No.1 glacier | 14          | SRR5506596               |

|                   |                            |          |                                                         |                       |    |            |
|-------------------|----------------------------|----------|---------------------------------------------------------|-----------------------|----|------------|
| XB41              | 1.9683                     | JX290485 | <i>F. limicola</i> ST-82 (98.40)                        | Toumingmengke glacier | 14 | SRR5506595 |
| XB43              | 1.9569                     | JX290476 | <i>F. sinopsychrotolerans</i> 0533 (98.98)              | Toumingmengke glacier | 14 | SRR5506594 |
| XB44              | 1.9784                     | JX290490 | <i>F. xinjiangense</i> JCM 11314 (99.64)                | Midui glacier         | 14 | SRR5506593 |
| XB45              | <b>1.10076<sup>T</sup></b> | JQ002654 | <b><i>F. noncentrifugens</i> R-HLS-17<sup>T,5</sup></b> | Hailuogou glacier     | 29 | SRR5506592 |
| XB47              | 1.9680                     | JX290484 | <i>F. limicola</i> ST-82 (98.20)                        | Toumingmengke glacier | 14 | SRR5506591 |
| XB48              | 1.9672                     | JX290483 | <i>F. xueshanense</i> Sr22 (97.76)                      | Toumingmengke glacier | 14 | SRR5506590 |
| XB49              | 1.9702                     | JX290488 | <i>F. sinopsychrotolerans</i> 0533 (96.15)              | Toumingmengke glacier | 14 | SRR5506589 |
| XB50              | 1.9696                     | JX290487 | <i>F. sinopsychrotolerans</i> 0533 (98.91)              | Toumingmengke glacier | 14 | SRR5506588 |
| XB51              | 1.10018                    | JX290499 | <i>F. xinjiangense</i> JCM 11314 (100)                  | Hailuogou glacier     | 14 | SRR5506587 |
| Hh15 <sup>T</sup> | <b>1.11210<sup>T</sup></b> |          | <b><i>Cryobacterium luteum</i><sup>6</sup></b>          |                       | 14 |            |

\* Strains have been deposited in public culture collection centers as indicated. CGMCC, China General Microorganism Culture Collection Center. Bold letters refer to the validate published species in the references as indicated by superscripted numbers as following,

1. Zhu F, Wang S, Zhou P. (2003) *Flavobacterium xinjiangense* sp. nov. and *Flavobacterium omnivorum* sp. nov., novel psychrophiles from China No1 glacier. IJSEM 53: 853-857.
2. Xin, Y.H., Liang, Z.H., Zhang, D.C., Liu, H.C., Zhang, J.L., Yu, Y., Xu, M.S., Zhou, P.J., and Zhou, Y.G. (2009). *Flavobacterium tiangeerense* sp. nov., a cold-living bacterium isolated from a glacier. Int J Syst Evol Microbiol 59, 2773-2777.
3. Xu, M., Xin, Y., Tian, J., Dong, K., Yu, Y., Zhang, J., Liu, H., and Zhou, Y. (2011). *Flavobacterium sinopsychrotolerans* sp. nov., isolated from a glacier. Int J Syst Evol Microbiol 61, 20-24
4. Dong, K., Liu, H., Zhang, J., Zhou, Y., and Xin, Y. (2012). *Flavobacterium xueshanense* sp. nov. and *Flavobacterium urumqiense* sp. nov., two psychrophilic bacteria isolated from glacier ice. Int J Syst Evol Microbiol 62, 1151-1157.
5. Zhu, L., Liu, Q., Liu, H., Zhang, J., Dong, X., Zhou, Y., and Xin, Y. (2013). *Flavobacterium noncentrifugens* sp. nov., a psychrotolerant bacterium isolated from glacier meltwater. Int J Syst Evol Microbiol 63, 2032-2037.
6. Liu Q, Liu HC, Wen Y, Zhou YG, Xin YH. (2012). *Cryobacterium flavum* sp. nov. and *Cryobacterium luteum* sp. nov., isolated from glacier ice. Int J Syst Evol Microbiol 62, 1296-1299.

Supplementary Table 2. Primers used in this study

| Primer     | Sequence (5'→3')                 | Purpose                                    |                         |
|------------|----------------------------------|--------------------------------------------|-------------------------|
| PRf        | ATGTTATTHCAGGATTAGTYGSDA         | Amplification of PR gene                   |                         |
| PRr        | CAAANCCDATTTRTRTRATNGCATC        |                                            |                         |
| XB32PR379F | GGAGAAGCGGTAGACAGAC              | Quantification of the PR transcript copies |                         |
| XB32PR554R | GACCATCCAATAACGAACC              |                                            |                         |
| XB26PR419f | TAATCTCAGGTATCGCTTAC             |                                            |                         |
| XB26PR590r | CCGTCAGTTCCTAACATAT              |                                            |                         |
| XB07PR237f | GTCACCAACTTTCTTTCG               |                                            |                         |
| XB07PR399r | AACTTCACCAATGTAACCT              |                                            |                         |
| XB10PR40f  | ATGTTACCTACTGATTATGTTG           |                                            |                         |
| XB10PR200r | TAATGTACCGCAGCAATA               |                                            |                         |
| XB30PR244f | ACTTTCTTTCGTTATGTTGAC            |                                            |                         |
| XB30PR416r | GCACTATCCGTGAATACC               |                                            |                         |
| PRup-SalF  | ACGCGTCGACTAATCAGTCGGCAACATTTTCC |                                            | Deletion of the PR gene |
| PRup-SphR  | ACATGCGATGCGTCAGACCAATAAAGCCAAA  |                                            |                         |
| PRdn-KpnF  | CGGGGTACCTGCCAAAAAATCCGATG       |                                            |                         |
| PRdn-SalR  | ACGCGTCGACAATAAAATTGGGTTTGGATTA  |                                            |                         |
| PR_delF    | ACATTAAGAAGTTGCTCT               |                                            |                         |
| PR_delR    | ACCACTACATAATACCCT               |                                            |                         |

**Supplementary Table 3. Growth rates ( $\mu$ /d) and final cell yields (OD600) of light (L)- vs. dark(D)-cultures of the 47 glacial *Flavobacterium* strains<sup>&</sup>**

<sup>&</sup>, triplicate cultures of each strain were assayed; growth rates were calculated based on the regression of growth rate of the triplicate culture, and the final OD600 averages and standard deviates were shown. Hh15<sup>T</sup>, *Cryobacterium luteum*.

<sup>\*</sup>, only the final OD600 values are recorded due to flocculent cultures;

<sup>#</sup>, light-dark growths of the strains were also tested in pre-illuminated medium.

<sup>†</sup>, light-dark growths of strain XB07 at oligotrophic condition.

| Stains            | $\mu$ /dark | $\mu$ /light | $\mu$ fold of<br>L/D | Final OD600<br>/dark | Final OD600<br>/light | Final OD600<br>fold of L/D |
|-------------------|-------------|--------------|----------------------|----------------------|-----------------------|----------------------------|
| XB01              | 0.11        | 0.13         | 1.2                  | 0.52±0.026           | 0.65±0.03             | 1.3                        |
| XB02              | 0.17        | 0.22         | 1.3                  | 0.84±0.02            | 1.12±0.02             | 1.3                        |
| XB03              | 0.16        | 0.28         | 1.8                  | 0.61±0.01            | 0.99±0.02             | 1.6                        |
| XB04              | 0.06        | 0.09         | 1.5                  | 0.51±0.01            | 0.85±0.015            | 1.8                        |
| XB05 <sup>#</sup> | 0.03        | 0.08         | 2.7                  | 0.43±0.012           | 0.49±0.08             | 1.1                        |
| XB06              | 0.09        | 0.13         | 1.4                  | 1.14±0.02            | 1.72±0.05             | 1.5                        |
| XB07 <sup>#</sup> | 0.04        | 0.09         | 2.2                  | 0.42±0.016           | 0.92±0.031            | 2.2                        |
| XB07 <sup>†</sup> | 0.01        | 0.05         | 5.00                 | 0.15±0.02            | 0.39±0.00             | 2.5                        |
| XB08              | 0.15        | 0.25         | 1.7                  | 1.23±0.07            | 1.51±0.08             | 1.2                        |
| XB09              | 0.08        | 0.13         | 1.6                  | 0.87±0.01            | 1.29±0.02             | 1.5                        |
| XB10              | 0.06        | 0.11         | 1.8                  | 0.58±0.023           | 0.97±0.016            | 1.7                        |
| XB11              | 0.06        | 0.13         | 2.2                  | 1.4±0.04             | 1.52±0.07             | 1.1                        |
| XB12              | 0.05        | 0.09         | 1.8                  | 0.87±0.02            | 1.38±0.05             | 1.6                        |
| XB13              | 0.12        | 0.19         | 1.6                  | 1.43±0.04            | 1.9±0.05              | 1.3                        |
| XB14              | 0.12        | 0.19         | 1.6                  | 1.16±0.05            | 1.5±0.07              | 1.3                        |
| XB15              | 0.04        | 0.11         | 2.8                  | 0.81±0.02            | 1.33±0.04             | 1.6                        |
| XB16              | 0.03        | 0.1          | 3.3                  | 0.72±0.01            | 1.33±0.03             | 1.9                        |
| XB17              | 0.08        | 0.12         | 1.5                  | 1.04±0.02            | 1.12±0.02             | 1.1                        |
| XB18              | 0.07        | 0.13         | 1.9                  | 0.93±0.04            | 1.13±0.03             | 1.2                        |
| XB19              | 0.03        | 0.08         | 2.7                  | 0.99±0.02            | 1.29±0.025            | 1.3                        |
| XB20              | 0.03        | 0.05         | 1.7                  | 0.88±0.01            | 1.06±0.02             | 1.2                        |
| XB21              | 0.05        | 0.08         | 1.6                  | 0.87±0.015           | 1.38±0.03             | 1.6                        |
| XB22              | 0.03        | 0.05         | 1.7                  | 0.68±0.01            | 0.85±0.04             | 1.3                        |
| XB23              | 0.03        | 0.07         | 2.3                  | 0.75±0.03            | 1.32±0.05             | 1.8                        |
| XB24              | 0.04        | 0.07         | 1.8                  | 0.7±0.02             | 1.03±0.05             | 1.5                        |
| XB25              | 0.06        | 0.12         | 2.0                  | 0.92±0.02            | 1.16±0.035            | 1.3                        |
| XB26              | 0.04        | 0.07         | 1.8                  | 0.41±0.021           | 0.78±0.035            | 1.9                        |
| XB27              | 0.03        | 0.05         | 1.7                  | 0.68±0.01            | 0.78±0.01             | 1.2                        |
| XB28              | 0.04        | 0.07         | 1.8                  | 0.43±0.01            | 0.84±0.02             | 2.0                        |
| XB30              | 0.03        | 0.06         | 2.0                  | 0.32±0.04            | 0.54±0.04             | 1.7                        |
| XB31              | 0.05        | 0.09         | 1.8                  | 0.68±0.01            | 0.93±0.02             | 1.4                        |
| XB32              | 0.05        | 0.08         | 1.6                  | 0.59±0.01            | 0.92±0.036            | 1.6                        |
| XB33              | 0.07        | 0.11         | 1.6                  | 1.23±0.01            | 1.46±0.04             | 1.2                        |
| XB35              | 0.08        | 0.15         | 1.9                  | 1.07±0.01            | 1.69±0.01             | 1.6                        |

|                   |      |      |     |                  |                 |     |
|-------------------|------|------|-----|------------------|-----------------|-----|
| XB36              | 0.06 | 0.09 | 1.5 | $0.64 \pm 0.03$  | $1.26 \pm 0.00$ | 1.6 |
| XB37              | 0.01 | 0.04 | 4.0 | $0.41 \pm 0.01$  | $0.85 \pm 0.02$ | 2.1 |
| XB38              | 0.01 | 0.02 | 2.0 | $0.29 \pm 0.01$  | $0.54 \pm 0.01$ | 1.9 |
| XB39*             | NA   | NA   |     | $0.39 \pm 0.005$ | $0.52 \pm 0.02$ |     |
| XB40              | 0.05 | 0.09 | 1.8 | $0.58 \pm 0.01$  | $0.93 \pm 0.02$ | 1.6 |
| XB41              | 0.03 | 0    |     | NA               | 0               |     |
| XB43              | 0.04 | 0.08 | 2.0 | $0.45 \pm 0.034$ | $0.94 \pm 0.04$ | 2.1 |
| XB44              | 0.09 | 0.17 | 1.9 | $1.41 \pm 0.02$  | $1.86 \pm 0.04$ | 1.3 |
| XB45              | 0.03 | 0.08 | 2.7 | $0.55 \pm 0.01$  | $0.66 \pm 0.03$ | 1.2 |
| XB47              | 0.04 | 0    |     | NA               | 0               |     |
| XB48              | 0.05 | 0.12 | 2.4 | $1.21 \pm 0.02$  | $1.66 \pm 0.03$ | 1.4 |
| XB49              | 0.02 | 0.07 | 3.5 | $0.53 \pm 0.01$  | $0.72 \pm 0.02$ | 1.4 |
| XB50              | 0.03 | 0.06 | 2.0 | $0.71 \pm 0.02$  | $1.23 \pm 0.04$ | 1.7 |
| XB51              | 0.08 | 0.15 | 1.9 | $1.06 \pm 0.01$  | $1.17 \pm 0.02$ | 1.1 |
| Hh15 <sup>T</sup> | 0.06 | 0.06 | 1.0 | $0.56 \pm 0.07$  | $0.56 \pm 0.08$ | 1.0 |

**Supplementary Table 4. Genome sizes and numbers of the over-representative genes in each of 47 glacier strains\***

\* *crtBIYZ*, the gene cluster encoding zeaxanthin; *dar*, the gene cluster encoding flexirubin; *prd*, the proteorhodopsin gene; *blh*, the gene for  $\beta$ -carotene dioxygenase; NF, not found.

<sup>#</sup>, the absence of the *prd* gene has been verified by no PCR product amplified using the gene generated primers listed in supplementary table 4.

| Isolates                                | N50<br>(Kbp) | Genome<br>size<br>(Mbp) | <i>crtBIYZ</i> | <i>dar</i> | <i>prd</i> <sup>#</sup> | <i>blh</i> | TonB-<br>dependent<br>receptor<br>numbers | ECF-type sigma factor<br>numbers (total $\sigma$ factor<br>numbers) | Two-component system<br>numbers |                       | Cold shock<br>protein numbers |
|-----------------------------------------|--------------|-------------------------|----------------|------------|-------------------------|------------|-------------------------------------------|---------------------------------------------------------------------|---------------------------------|-----------------------|-------------------------------|
|                                         |              |                         |                |            |                         |            |                                           |                                                                     | Histidine<br>kinase             | Response<br>regulator |                               |
| Strains isolated from southern glaciers |              |                         |                |            |                         |            |                                           |                                                                     |                                 |                       |                               |
| XB01                                    | 241,851      | 6.5                     | +              | +          | -                       | -          | 100                                       | 19(28)                                                              | 53                              | 79                    | 5                             |
| XB02                                    | 460,503      | 5.6                     | +              | +          | -                       | -          | 89                                        | 23(36)                                                              | 40                              | 53                    | 1                             |
| XB03                                    | 369,172      | 6.5                     | +              | +          | -                       | -          | 101                                       | 19(28)                                                              | 54                              | 79                    | 5                             |
| XB05                                    | 761,497      | 4.1                     | +              | -          | -                       | -          | 51                                        | 8(15)                                                               | 27                              | 34                    | 1                             |
| XB08                                    | 396,009      | 3.4                     | +              | -          | +                       | NF         | 29                                        | 5(8)                                                                | 21                              | 25                    | 1                             |
| XB09                                    | 234,309      | 3.7                     | +              | -          | +                       | +          | 28                                        | 5(9)                                                                | 32                              | 37                    | 1                             |
| XB31                                    | 761,345      | 4.1                     | +              | -          | -                       | -          | 52                                        | 10(16)                                                              | 26                              | 34                    | 1                             |
| XB32                                    | 379,396      | 3.8                     | +              | -          | +                       | +          | 28                                        | 7(10)                                                               | 28                              | 37                    | 1                             |
| XB33                                    | 155,378      | 4.0                     | +              | -          | +                       | +          | 32                                        | 7(10)                                                               | 25                              | 40                    | 1                             |
| XB35                                    | 562,988      | 3.7                     | +              | -          | +                       | +          | 37                                        | 9(35)                                                               | 23                              | 31                    | 1                             |
| XB36                                    | 417,640      | 5.5                     | +              | +          | -                       | -          | 77                                        | 20(32)                                                              | 41                              | 57                    | 3                             |
| XB44                                    | 818,938      | 3.8                     | +              | -          | +                       | +          | 34                                        | 6(9)                                                                | 21                              | 35                    | 1                             |
| XB45                                    | 1,059,330    | 4.0                     | +              | +          | -                       | -          | 26                                        | 9(10)                                                               | 27                              | 52                    | 1                             |
| XB51                                    | 215,962      | 4.0                     | +              | -          | +                       | +          | 28                                        | 7(10)                                                               | 25                              | 35                    | 1                             |
| Strains isolated from northern glaciers |              |                         |                |            |                         |            |                                           |                                                                     |                                 |                       |                               |
| XB04                                    | 67,384       | 3.5                     | +              | -          | +                       | +          | 27                                        | 5(9)                                                                | 19                              | 26                    | 1                             |

|      |         |     |   |   |   |    |    |        |    |    |   |
|------|---------|-----|---|---|---|----|----|--------|----|----|---|
| XB06 | 269,129 | 3.6 | + | - | + | +  | 31 | 9(13)  | 27 | 27 | 1 |
| XB07 | 302,468 | 3.7 | + | - | + | +  | 38 | 9(14)  | 28 | 28 | 1 |
| XB10 | 175,403 | 3.7 | + | - | + | +  | 33 | 8(15)  | 24 | 32 | 1 |
| XB11 | 235,828 | 3.9 | + | - | + | NF | 29 | 5(9)   | 33 | 37 | 1 |
| XB12 | 558,867 | 3.5 | + | - | + | +  | 32 | 7(9)   | 19 | 25 | 2 |
| XB13 | 300,785 | 3.5 | + | - | + | +  | 32 | 10(15) | 27 | 27 | 1 |
| XB14 | 353,682 | 3.5 | + | - | + | +  | 32 | 7(14)  | 25 | 28 | 1 |
| XB15 | 215,725 | 3.4 | + | - | + | +  | 28 | 5(9)   | 17 | 20 | 1 |
| XB16 | 212,768 | 3.5 | + | - | + | +  | 31 | 8(14)  | 25 | 25 | 1 |
| XB17 | 298,385 | 3.6 | + | - | + | +  | 31 | 9(13)  | 28 | 27 | 1 |
| XB18 | 189,248 | 3.7 | + | - | + | +  | 25 | 5(9)   | 23 | 30 | 1 |
| XB19 | 216,389 | 3.7 | + | - | + | +  | 30 | 9(12)  | 23 | 22 | 1 |
| XB20 | 219,145 | 3.6 | + | - | + | +  | 34 | 9(16)  | 26 | 25 | 1 |
| XB21 | 462,002 | 3.4 | + | - | + | NF | 29 | 5(9)   | 22 | 28 | 1 |
| XB22 | 345,953 | 3.5 | + | - | + | +  | 25 | 6(10)  | 30 | 22 | 1 |
| XB23 | 481,111 | 3.4 | + | - | + | +  | 62 | 6(12)  | 62 | 19 | 1 |
| XB24 | 216,315 | 3.7 | + | - | + | +  | 29 | 9(12)  | 23 | 22 | 1 |
| XB25 | 187,798 | 3.5 | + | - | + | +  | 32 | 6(11)  | 22 | 21 | 1 |
| XB26 | 283,155 | 3.6 | + | - | + | +  | 28 | 6(10)  | 20 | 31 | 1 |
| XB27 | 340,820 | 3.0 | + | - | + | +  | 24 | 7(10)  | 20 | 18 | 1 |
| XB28 | 193,754 | 3.5 | + | - | + | +  | 35 | 9(16)  | 26 | 25 | 1 |
| XB30 | 185,953 | 3.5 | + | - | + | +  | 31 | 8(14)  | 25 | 25 | 1 |
| XB37 | 159,605 | 3.5 | + | - | + | +  | 29 | 8(12)  | 24 | 23 | 1 |
| XB38 | 121,516 | 3.5 | + | - | + | +  | 36 | 9(15)  | 18 | 23 | 1 |
| XB39 | 137,582 | 3.6 | + | - | + | +  | 30 | 5(8)   | 22 | 35 | 1 |
| XB40 | 193,433 | 3.4 | + | - | + | +  | 28 | 9(12)  | 23 | 19 | 1 |

|      |         |     |   |   |   |   |    |        |    |    |   |
|------|---------|-----|---|---|---|---|----|--------|----|----|---|
| XB41 | 116,021 | 4.1 | - | + | - | - | 50 | 10(15) | 20 | 23 | 1 |
| XB43 | 183,002 | 4.6 | + | - | - | - | 52 | 10(16) | 27 | 41 | 1 |
| XB47 | 116,001 | 4.1 | - | + | - | - | 50 | 10(15) | 22 | 23 | 1 |
| XB48 | 240,098 | 3.4 | + | - | + | + | 41 | 7(15)  | 12 | 21 | 1 |
| XB49 | 233,761 | 3.4 | + | - | + | + | 41 | 7(15)  | 12 | 20 | 1 |
| XB50 | 309,273 | 3.4 | + | - | + | + | 23 | 6(7)   | 20 | 30 | 1 |
